# Supplementary material
Source: Springer Nature journal article supplement (https://www.springermedizin.de/resource/supplementary/13054_2009_7628_MOESM1_ESM.pdf/9730190)

# fibrinogen level

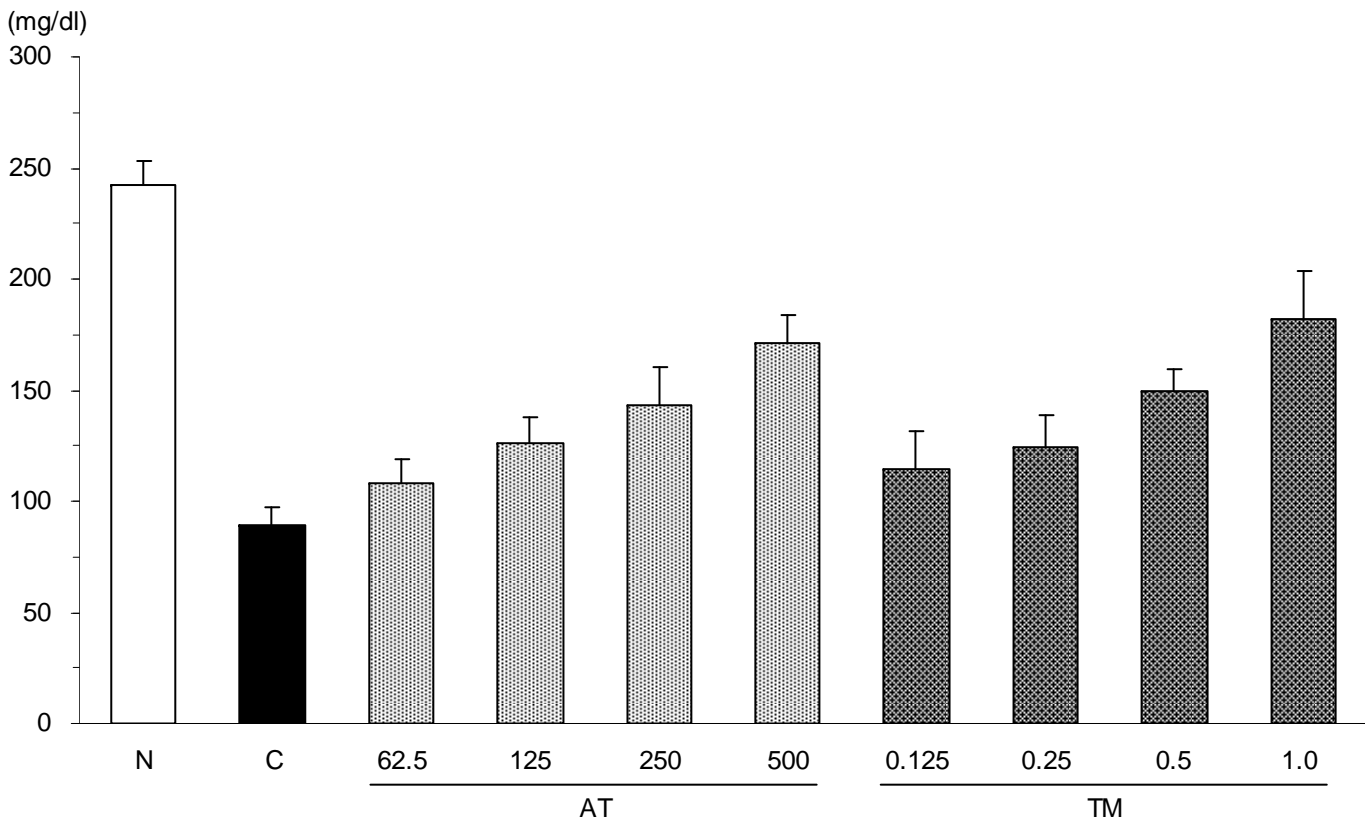

Supplement: MOESM1 [file 9730190]
